# Supplementary material for: Unraveling the mechanism of methyl acetate additive for reinforcing the solid electrolyte interface on graphite anodes
Source: Royal Society of Chemistry journal article supplement (doi:10.1039/d4ta03301a), 2024-01-01
Supplement: d4ta03301a1.pdf [file d4ta03301a1.pdf]

## Supporting Information

### Unraveling the mechanism of methyl acetate additive for reinforcing solid electrolyte interface on graphite anodes

*Jing Hao<sup>a</sup>, Wen Liu<sup>a</sup>, Yao Tian<sup>a</sup>, Junru Wu<sup>a</sup>, Hexin Guo<sup>a</sup>, Guobin Zhang<sup>b\*</sup>, Yong Yi<sup>c</sup>, Cuiping Han<sup>d\*</sup>, Feiyu Kang<sup>a</sup>, Baohua Li<sup>a\*</sup>*

<sup>a</sup> Tsinghua Shenzhen International Graduate School, Tsinghua University, Shenzhen 518055, China.

<sup>b</sup> Future technology school, Shenzhen Technology University, Shenzhen, 518055, China.

<sup>c</sup> Shenzhen Power Supply Co., Ltd. Shenzhen, 518020, China.

<sup>d</sup> Faculty of Materials Science and Energy Engineering, Institute of Technology for Carbon Neutrality, Shenzhen Institute of Advanced Technology, Chinese Academy of Sciences (CAS), Shenzhen 518055, China.

#### AUTHOR INFORMATION

##### Corresponding Author

\*E-mail: [libh@mail.sz.tsinghua.edu.cn](mailto:libh@mail.sz.tsinghua.edu.cn) (B.H. Li)

\*E-mail: [cp.han@siat.ac.cn](mailto:cp.han@siat.ac.cn) (C.P. Han)

\*E-mail: [whutzgb@163.com](mailto:whutzgb@163.com) (G.B. Zhang)

| Solvent            | Melting Point (°C) | Boiling Point (°C) | Viscosity (cP) | Dielectric Constant ( $\epsilon$ ) |
|--------------------|--------------------|--------------------|----------------|------------------------------------|
| Ethylene Carbonate | 36.4               | 248                | 19.7           | 89.8 (40°C)                        |
| Dimethyl Carbonate | 0.5                | 90.5               | 0.585          | 3.09 (25°C)                        |
| Diethyl Carbonate  | -43                | 127                | 0.748          | 2.82 (25°C)                        |
| Methyl Acetate     | -98                | 57                 | 0.40           | 6.68 (25°C)                        |

**Table S1** Physical properties of ethylene carbonate, dimethyl carbonate, diethyl carbonate methyl acetate.

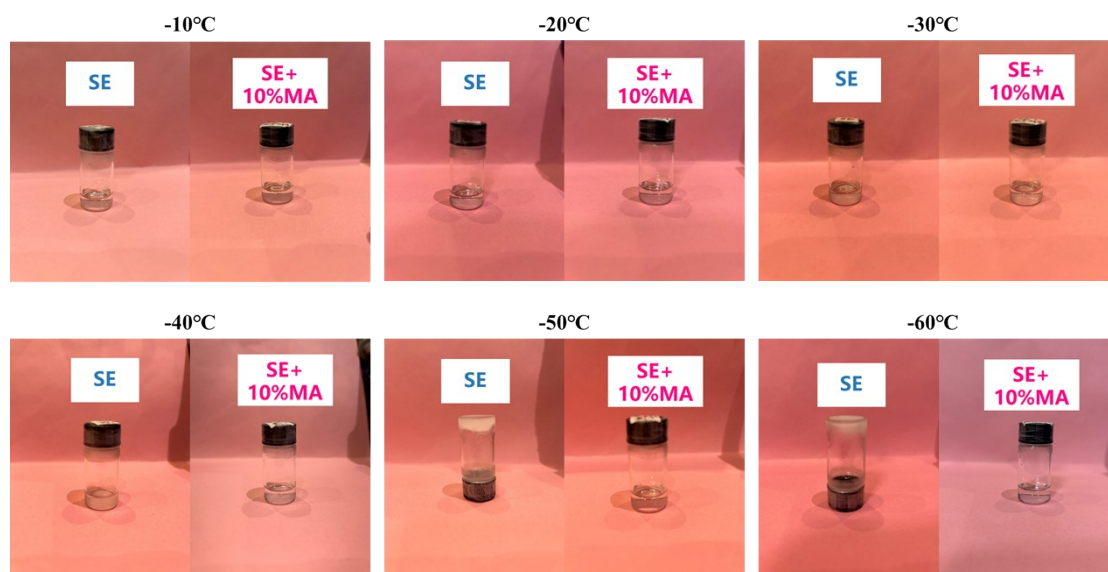

**Figure S1** The state pictures of the electrolyte SE and SE+10%MA at the temperature from -10 °C to -60 °C. Both electrolytes remain liquid at -40 °C. SE electrolyte solidifies at -50 °C, but SE +10%MA remain liquid at -60 °C.

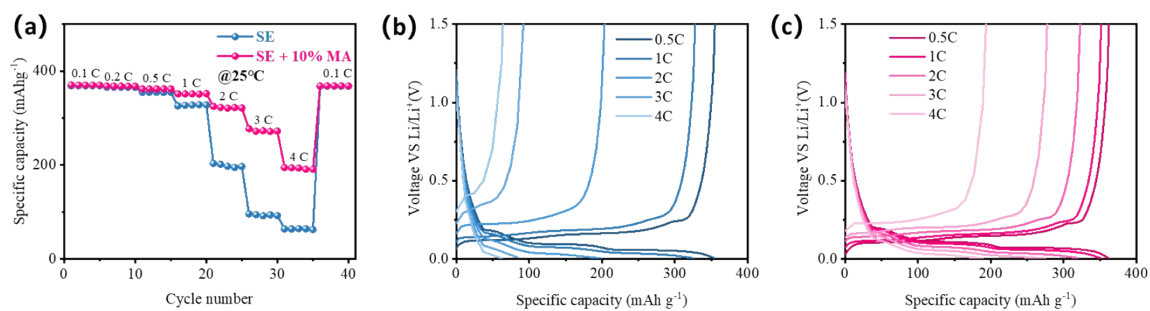

**Figure S2** (a) The rate performance of Li||Gr cells from 0.1C to 4C (1C=372 mAh g<sup>-1</sup>). The voltage evolution profiles of Li||Gr half cells at different rate in the electrolyte (b) SE and (c) SE + 10%MA.

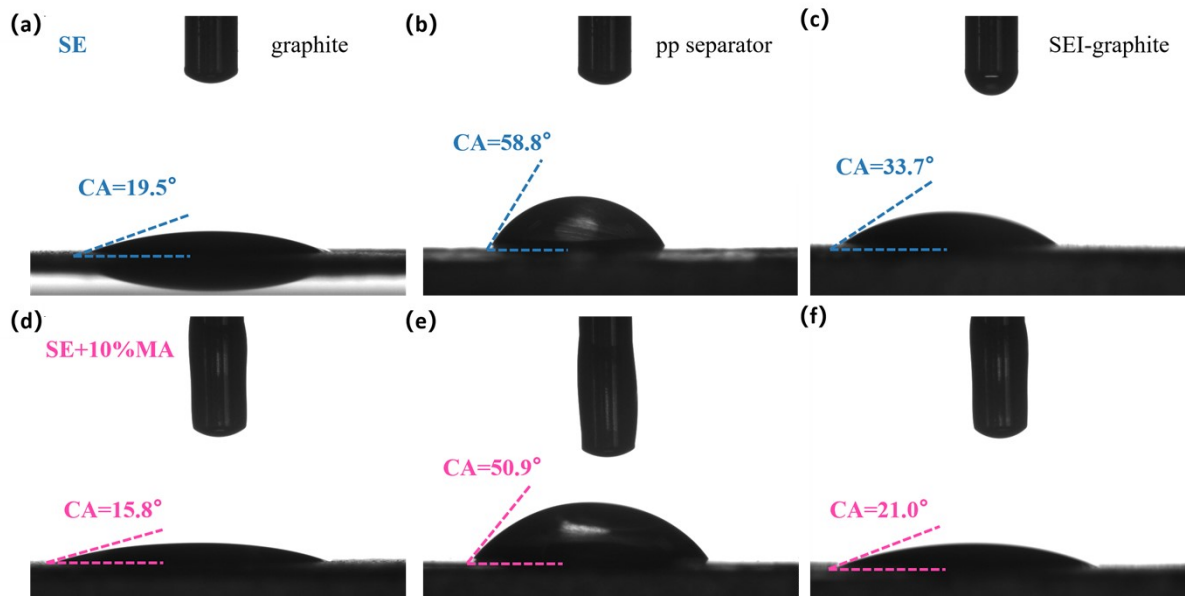

**Figure S3** Photographs of contact angle (CA) test of SE electrolyte for the (a) pristine graphite electrode (b) pp separator and (c) RT-activation SEI-graphite. SE+10%MA electrolyte for the (d) pristine graphite electrode (e) pp separator and (f) RT-activation SEI-graphite.

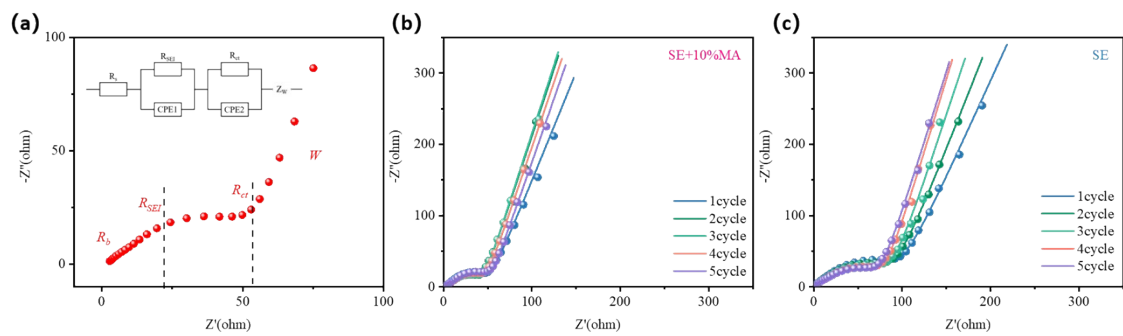

**Figure S4** (a) Equivalent circuit for the simulation of EIS results. EIS test results and fitted lines of graphite anodes in (b) SE and (b) SE+10%MA.

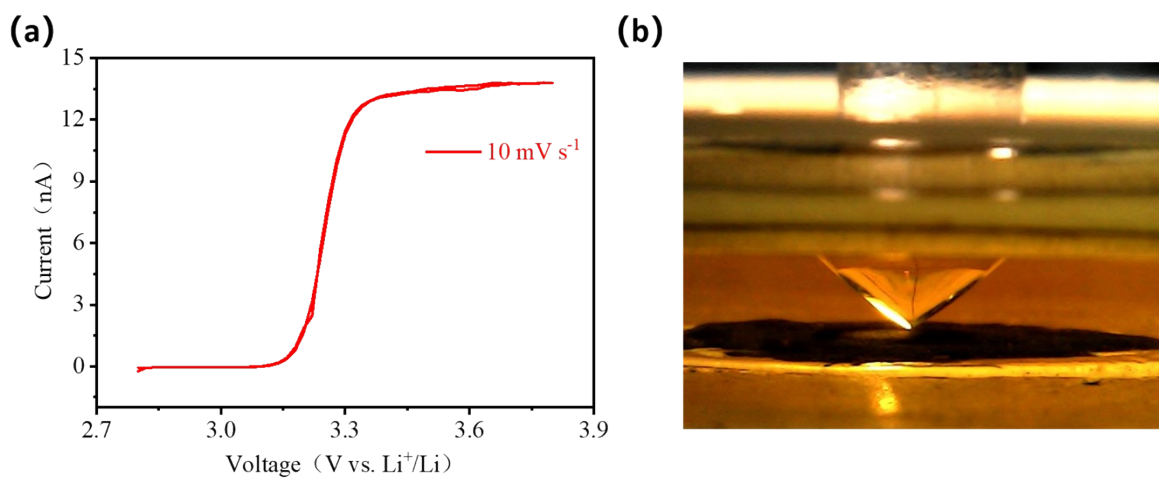

**Figure S5** (a) Cyclic voltammetry of the microprobe cycled between 2.8 V and 3.8 V vs. Li<sup>+</sup>/Li at a scan rate of 10 mV s<sup>-1</sup> in SE containing 10 mM Fc. (b) Photography of the microprobe above the graphite electrode observed from the optical microscope.

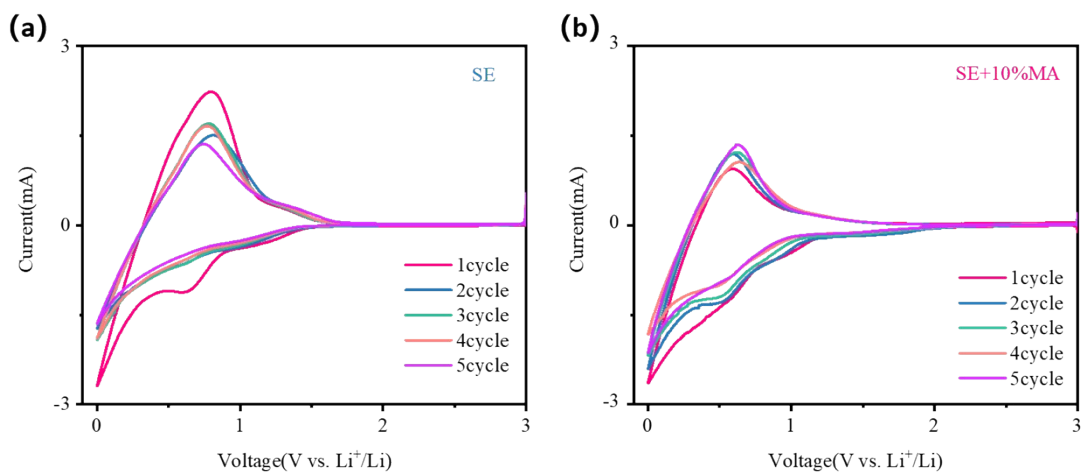

**Figure S6** CV curves of graphite electrodes in the potential window of 3.0-0.001 V vs Li<sup>+</sup> /Li at a scan rate of 1 mV s<sup>-1</sup> in the electrolyte (a) SE and (b) SE+10%MA.



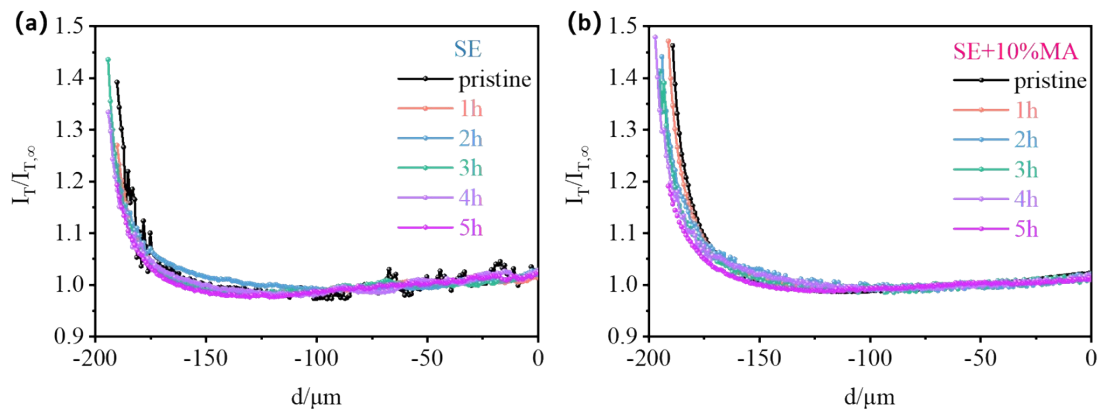

**Figure S7** Approach curves with a bias of 3.5 V on the microprobe toward graphite electrodes during the immersion for 5 hours in the electrolyte (a) SE and (b) SE+10%MA.

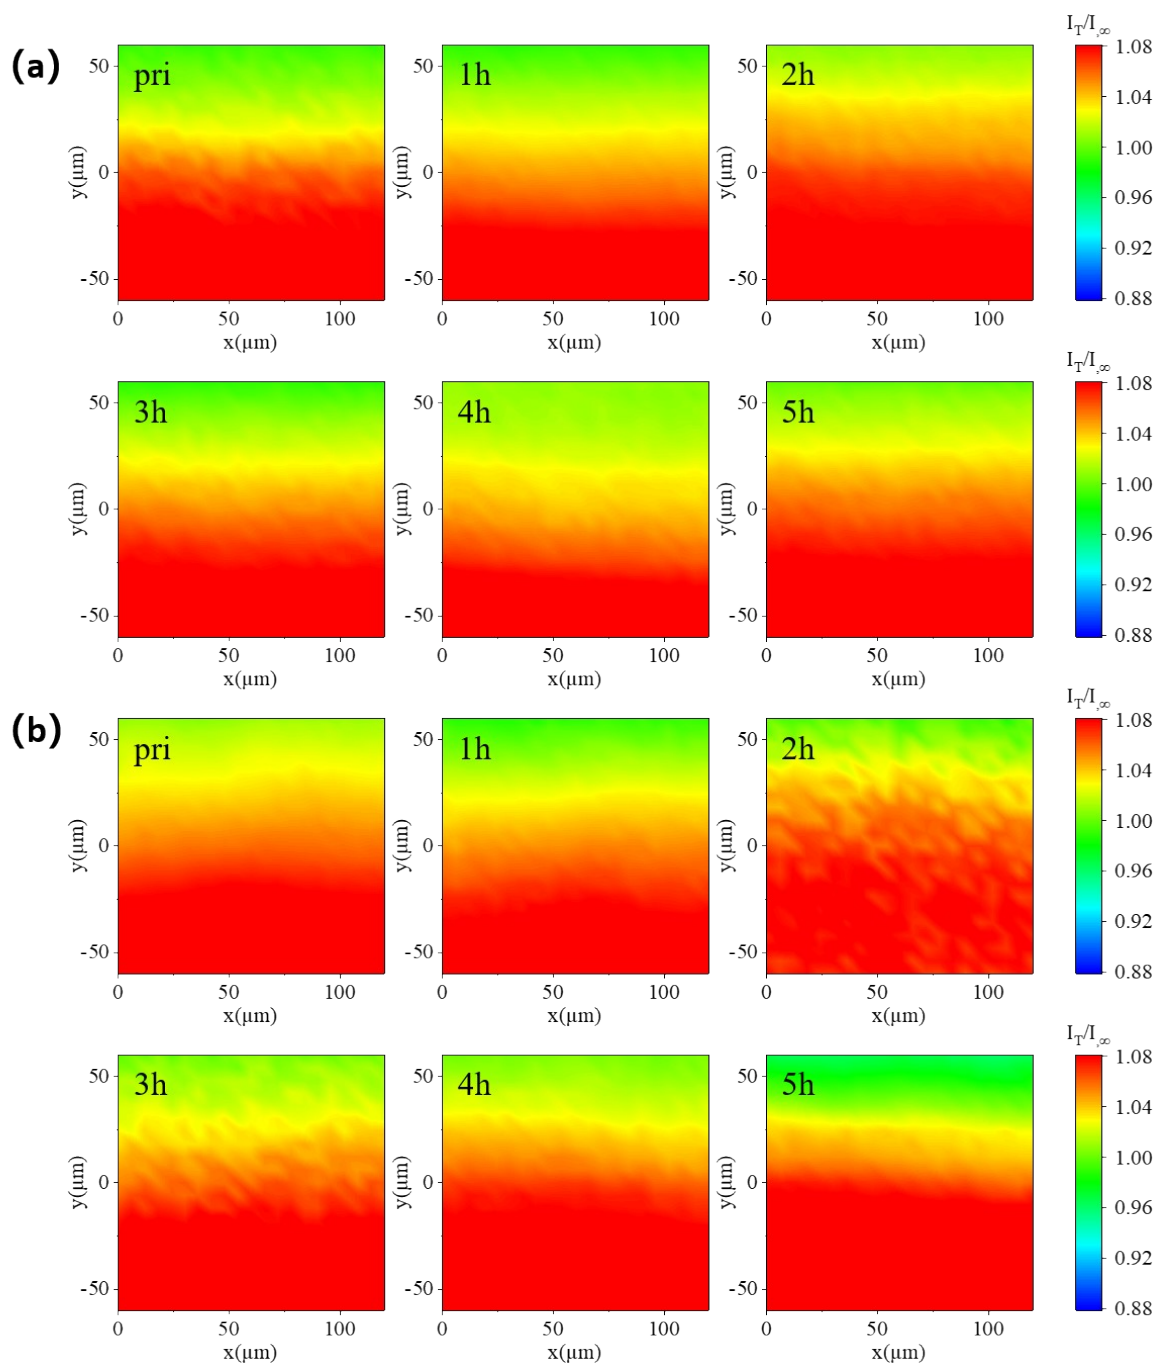

**Figure S8** Area scan with a bias of 3.5 V on the microprobe toward the graphite electrode during the immersion for 5 h in the electrolyte (a) SE and (b) SE+10%MA.

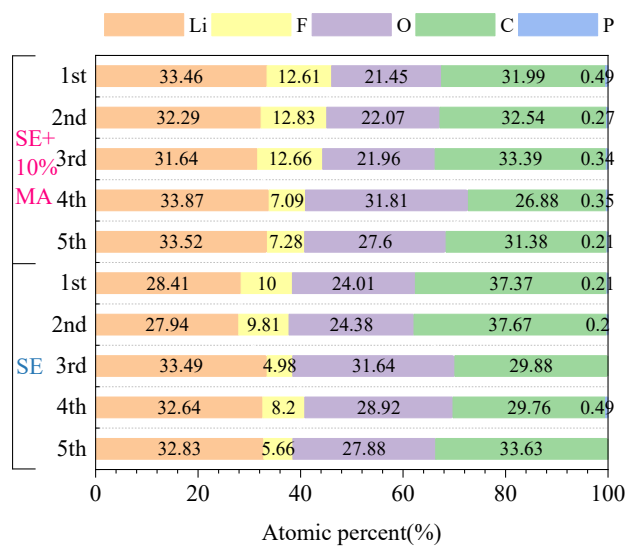

**Figure S9** XPS analysis of atomic concentration at different depth in electrolyte SE and SE +10%MA.

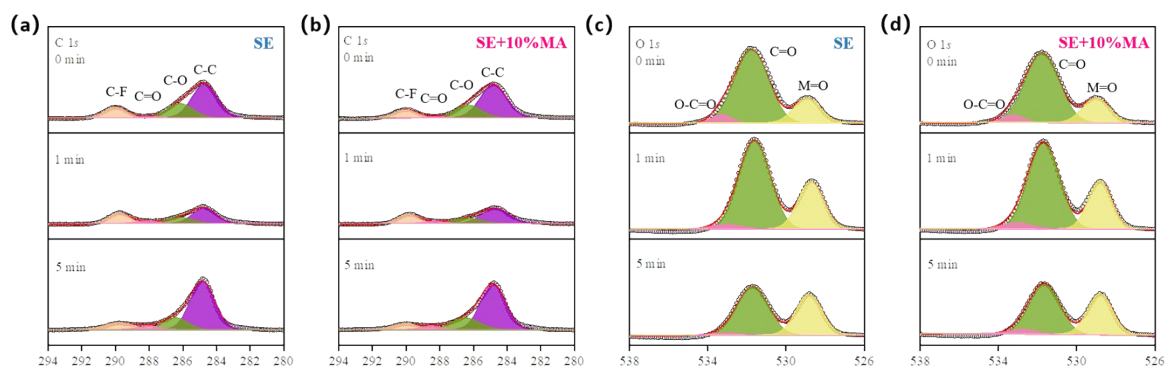

**Figure S10** C 1s XPS spectra of the SEI on graphite electrodes at different depths in (a) SE and (b) SE+10%MA. And the O 1s spectra (c) SE and (d) SE+10%MA.

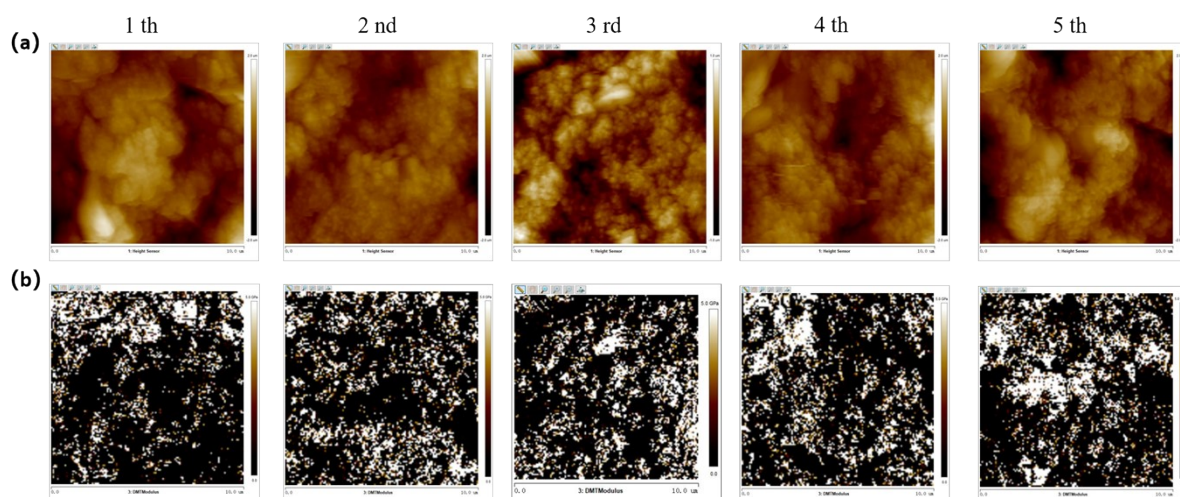

**Figure S11** AFM monitoring of the evolution on the surface of graphite anode after 1-5 cycles in SE +10%MA. (a) Morphology of the graphite electrode after 1-5 cycles. (b) The modulus mapping images.

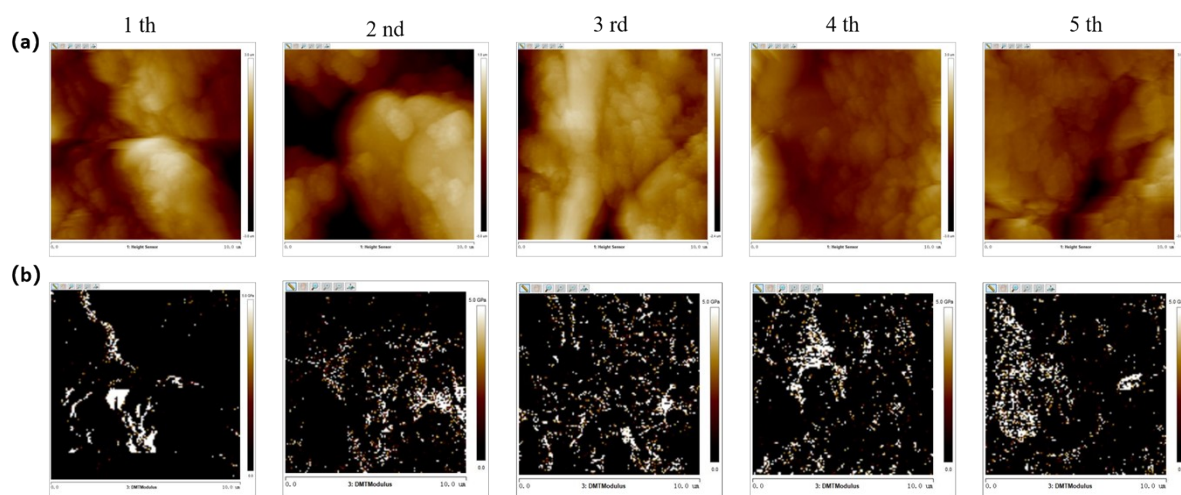

**Figure S12** AFM monitoring of the evolution on the surface of graphite anode after 1-5 cycles in SE. (a) Morphology of the graphite electrode after 1-5 cycles. (b) The modulus mapping images.
